# Supplementary material for: Serotonergic signals enhanced hamster sperm hyperactivation
Source: PubMed Central journal article supplement — J Reprod Dev. 2021 May 12;67(4):241–50. doi: 10.1262/jrd.2020-108 (PMC8423610; doi:10.1262/jrd.2020-108), 2021-05-12
Supplement: jrd-67-241-s001.pdf [file jrd-67-241-s001.pdf]

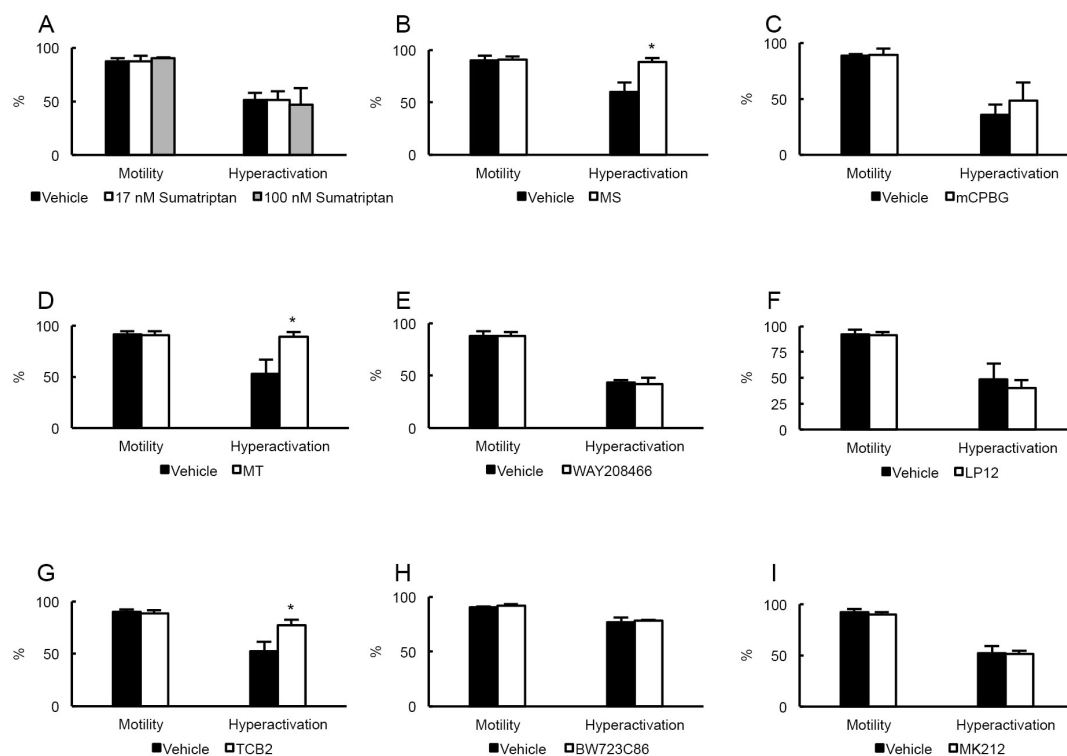

**Supplementary Fig. 1.** Effects of 5-HT receptor agonists on hamster sperm hyperactivation. Percentages of motility and hyperactivation were determined after 2 h of culture when sperm were cultured for 4 h with 17 nM or 100 nM sumatriptan (A), 100 fM MS (B), 100  $\mu$ M mCPBG (C), 10 pM MT (D), 7.3 nM WAY (E), 0.13 nM LP12 (F), 0.75 nM TCB2 (G), 2  $\mu$ M BW723C86 (H), and 0.3 nM MK212 (I). Data represent the mean  $\pm$  standard deviation (SD). (A) (Vehicle) the medium with 0.1% (v/v) pure water as vehicle; (respective concentrations of sumatriptan) the medium with indicated concentrations of sumatriptan and vehicle. (B) (Vehicle) same as above; (MS) the medium with 100 fM MS and vehicle. (C) (Vehicle) same as above; (mCPBG) the medium with 100  $\mu$ M mCPBG and vehicle. (D) (Vehicle) medium with 0.1% (v/v) ethanol as vehicle; (MT) medium with 10 pM MT and vehicle. (E) (Vehicle) medium with 0.1% (v/v) pure water as vehicle; (WAY) medium with 7.3 nM WAY and vehicle. (F) (Vehicle) same as above; (LP12) medium with 0.13 nM LP12 and vehicle. (G) (Vehicle) same as above; (TCB2) medium with 0.75 nM TCB2 and vehicle. (H) (Vehicle) medium with 0.1% (v/v) dimethyl sulfoxide as vehicle; (BW723C86) medium with 2  $\mu$ M BW723C86 and vehicle. (I) (Vehicle) medium with 0.1% (v/v) pure water as vehicle; (MK212) medium with 0.3 nM MK212 and vehicle. \* indicates significant differences compared with “Vehicle” ( $P < 0.05$ ). MS,  $\alpha$ -methylserotonin maleate; MT, 5-methoxytryptamine; mCPBG, 1-(3-chlorophenyl) biguanide hydrochloride.

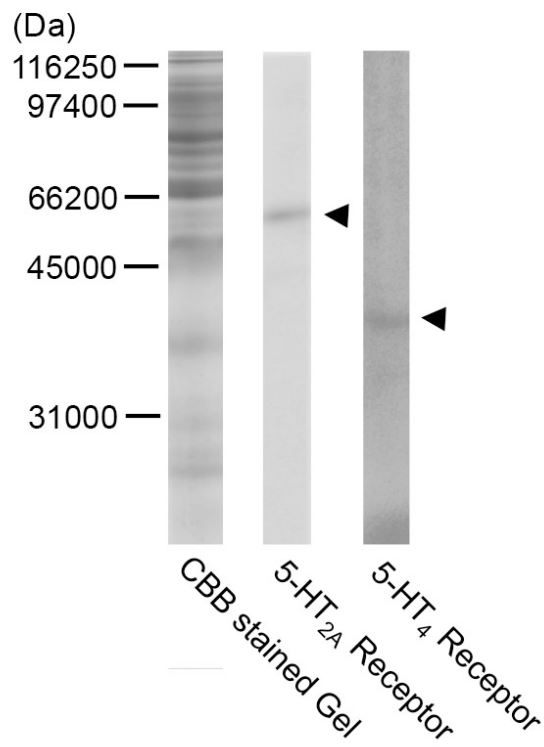

**Supplementary Fig. 2.** Detection of 5-HT<sub>2A</sub> and 5-HT<sub>4</sub> receptors from hamster sperm. Left lane shows CBB stained gel. Middle lane shows western blotting against the anti-5-HT<sub>2A</sub> receptor antibody. Right lane shows western blotting against anti-5-HT<sub>4</sub> receptor antibody. The numbers on the left side show molecular weight markers. Sperm protein extracts were applied at 10  $\mu$ l in each lane. Arrow indicates the antibody reaction.

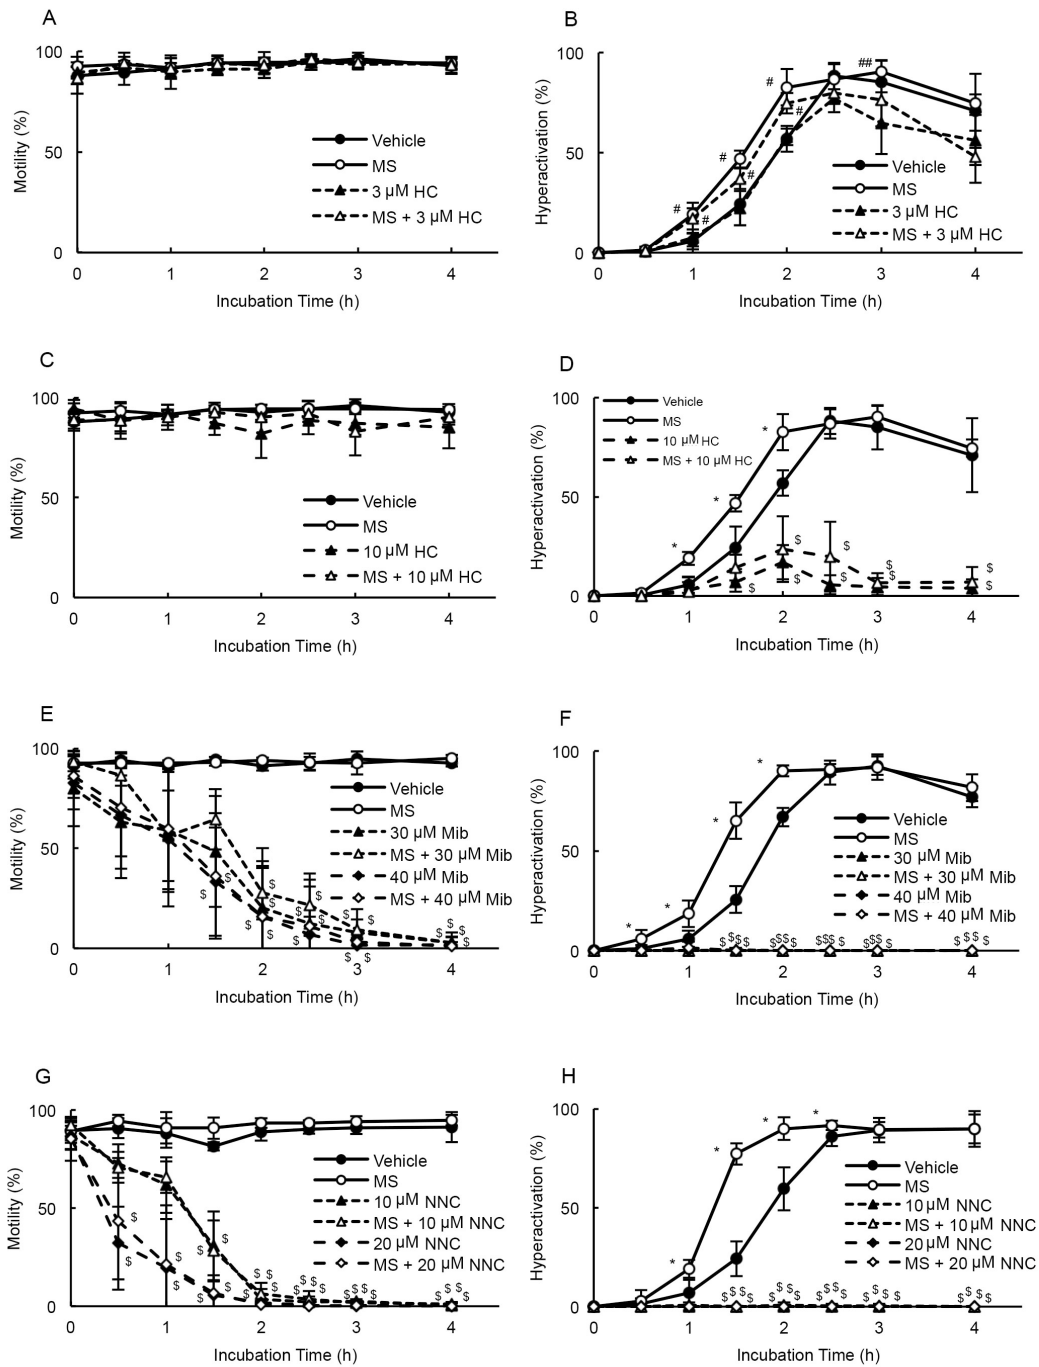

**Supplementary Fig. 3.** Suppression of MS-enhanced hyperactivation by CatSper inhibitors. Percentages of motility (A, C, E, and G) and hyperactivation (B, D, F, and H) were determined after sperm were cultured for 4 h with 100 fM MS and inhibitors, including 3  $\mu$ M HC (A and B), 10  $\mu$ M HC (C and D), 30 and 40  $\mu$ M Mib (E and F), and 10 and 20  $\mu$ M NNC (G and H). Data represent the mean  $\pm$  standard deviation (SD). **(A and B)** (Vehicle) medium with 0.1% (v/v)

pure water and 0.1% (v/v) dimethyl sulfoxide as vehicle; (MS) medium with 100 fM MS and vehicle; (3  $\mu$ M HC) medium with 3  $\mu$ M HC and vehicle; (MS + 3  $\mu$ M HC) medium with 100 fM MS, 3  $\mu$ M HC, and vehicle. **(C and D)** (Vehicle) same as above; (MS) medium with 100 fM MS and vehicle; (10  $\mu$ M HC) medium with 10  $\mu$ M HC and vehicle; (MS + 10  $\mu$ M HC) medium with 100 fM MS, 10  $\mu$ M HC, and vehicle. **(E and F)** (Vehicle) same as above; (MS) medium with 100 fM MS and vehicle; (30  $\mu$ M Mib) medium with 30  $\mu$ M Mib and vehicle; (MS + 30  $\mu$ M Mib) medium with 100 fM MS, 30  $\mu$ M Mib, and vehicle; (40  $\mu$ M Mib) medium with 40  $\mu$ M Mib and vehicle; (MS + 40  $\mu$ M Mib) medium with 100 fM MS, 40  $\mu$ M Mib, and vehicle. **(G and H)** (Vehicle) same as above; (MS) medium with 100 fM MS and vehicle; (10  $\mu$ M NNC) medium with 10  $\mu$ M NNC and vehicle; (MS + 10  $\mu$ M NNC) medium with 100 fM MS, 10  $\mu$ M NNC, and vehicle; (20  $\mu$ M NNC) medium with 20  $\mu$ M NNC and vehicle; (MS + 20  $\mu$ M NNC) medium with 100 fM MS, 20  $\mu$ M NNC, and vehicle. \* indicates significant differences compared with “Vehicle,” “inhibitors,” and “MS + inhibitors” ( $P < 0.05$ ). # indicates significant differences compared with “Vehicle” and “inhibitors” ( $P < 0.05$ ). ## indicates significant differences compared with “inhibitors” ( $P < 0.05$ ). \$ indicates significant differences compared with “Vehicle” and “MS” ( $P < 0.05$ ). MS,  $\alpha$ -methylserotonin maleate; HC, 2,4-dithenoyl-1,2,5-oxadiazole n2-oxide; Mib, mibefradil.

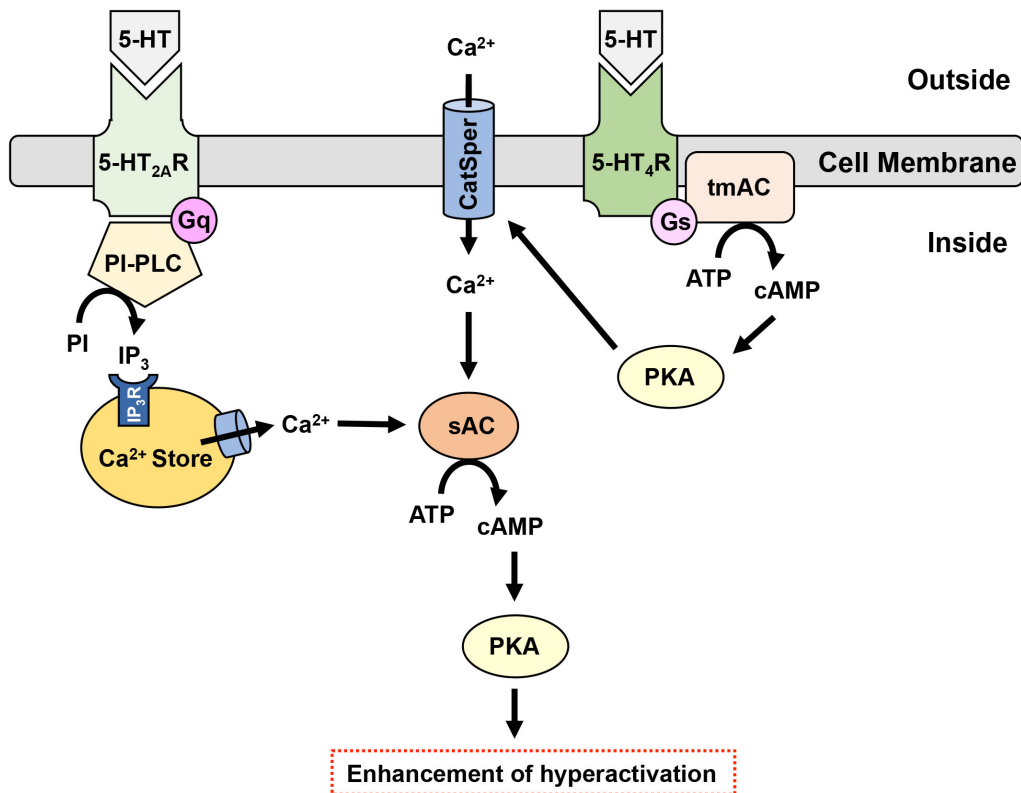

**Supplementary Fig. 4.** Hypothesis regarding regulatory mechanisms of 5-HT-enhanced hyperactivation in hamster sperm. 5-HT, 5-hydroxytryptamine; 5-HT<sub>2A</sub>R, 5-HT<sub>2A</sub> receptor; 5-HT<sub>4</sub>R, 5-HT<sub>4</sub> receptor; Gq, Gq-protein; Gs, Gs-protein; tmAC, transmembrane adenylate cyclase; sAC, soluble adenylate cyclase; PI, phosphatidylinositol; PI-PLC, phosphatidylinositol-phospholipase C; IP<sub>3</sub>, inositol 1,4,5-trisphosphate; IP<sub>3</sub>R, inositol 1,4,5-trisphosphate receptor; PKA, protein kinase A.

|              | 5-HT <sub>1</sub> Receptor |                   |                    | 5-HT <sub>2</sub> Receptor |                 | 5-HT <sub>3</sub> Receptor |                 |
|--------------|----------------------------|-------------------|--------------------|----------------------------|-----------------|----------------------------|-----------------|
|              | Vehicle                    | 17 nM Sumatriptan | 100 nM Sumatriptan | Vehicle                    | MS              | Vehicle                    | mCPBG           |
| VSL (µm/sec) | 110.73 ± 12.46             | 104.82 ± 16.56    | 90.28 ± 18.96      | 104.90 ± 18.57             | 83.45 ± 6.22*   | 115.85 ± 39.66             | 85.16 ± 17.29   |
| VCL (µm/sec) | 447.59 ± 104.29            | 400.38 ± 53.59    | 549.33 ± 94.50     | 498.89 ± 89.79             | 462.56 ± 44.30  | 512.13 ± 38.24             | 391.47 ± 62.71* |
| VAP (µm/sec) | 163.11 ± 12.16             | 176.04 ± 6.14     | 178.58 ± 23.42     | 155.91 ± 15.98             | 132.44 ± 13.65* | 176.05 ± 24.89             | 135.47 ± 34.99  |
| LIN          | 0.26 ± 0.09                | 0.30 ± 0.08       | 0.19 ± 0.08        | 0.23 ± 0.08                | 0.19 ± 0.03     | 0.24 ± 0.09                | 0.25 ± 0.07     |
| STR          | 0.60 ± 0.07                | 0.62 ± 0.09       | 0.52 ± 0.15        | 0.67 ± 0.07                | 0.64 ± 0.07     | 0.65 ± 0.14                | 0.65 ± 0.03     |
| ALH (µm)     | 11.50 ± 1.80               | 10.33 ± 0.75      | 11.11 ± 0.78       | 10.94 ± 1.55               | 10.03 ± 0.94    | 12.18 ± 0.76               | 9.39 ± 0.74*    |
| BCF (Hz)     | 7.34 ± 3.15                | 9.91 ± 1.65       | 7.41 ± 2.62        | 7.08 ± 3.94                | 5.98 ± 1.61     | 7.01 ± 1.75                | 7.94 ± 1.22     |
| WOB          | 0.39 ± 0.10                | 0.47 ± 0.06       | 0.35 ± 0.06        | 0.34 ± 0.09                | 0.31 ± 0.03     | 0.35 ± 0.07                | 0.38 ± 0.12     |

|              | 5-HT <sub>4</sub> Receptor |                | 5-HT <sub>6</sub> Receptor |                | 5-HT <sub>7</sub> Receptor |                |
|--------------|----------------------------|----------------|----------------------------|----------------|----------------------------|----------------|
|              | Vehicle                    | MT             | Vehicle                    | WAY208466      | Vehicle                    | LP12           |
| VSL (µm/sec) | 98.06 ± 13.24              | 94.60 ± 14.92  | 114.66 ± 28.42             | 102.94 ± 26.26 | 80.91 ± 17.19              | 90.91 ± 26.39  |
| VCL (µm/sec) | 437.32 ± 17.68             | 373.94 ± 92.14 | 492.85 ± 142.35            | 464.14 ± 91.87 | 479.68 ± 170.69            | 585.77 ± 90.05 |
| VAP (µm/sec) | 143.07 ± 15.47             | 131.59 ± 22.68 | 164.97 ± 39.79             | 169.98 ± 39.95 | 140.03 ± 27.62             | 145.30 ± 38.68 |
| LIN          | 0.24 ± 0.05                | 0.27 ± 0.07    | 0.0026 ± 0.06              | 0.24 ± 0.05    | 0.19 ± 0.06                | 0.16 ± 0.03    |
| STR          | 0.69 ± 0.06                | 0.72 ± 0.07    | 0.70 ± 0.06                | 0.62 ± 0.09    | 0.59 ± 0.03                | 0.64 ± 0.07    |
| ALH (µm)     | 10.53 ± 0.68               | 9.49 ± 0.94*   | 11.21 ± 2.88               | 11.25 ± 2.06   | 10.22 ± 3.28               | 12.35 ± 1.80   |
| BCF (Hz)     | 7.72 ± 3.00                | 9.45 ± 3.89    | 6.62 ± 1.77                | 6.74 ± 0.41    | 4.48 ± 1.18                | 3.49 ± 1.37    |
| WOB          | 0.34 ± 0.07                | 0.37 ± 0.07    | 0.36 ± 0.07                | 0.38 ± 0.05    | 0.32 ± 0.08                | 0.25 ± 0.05    |

|              | 5-HT <sub>2A</sub> Receptor |                | 5-HT <sub>2B</sub> Receptor |                 | 5-HT <sub>2C</sub> Receptor |                |
|--------------|-----------------------------|----------------|-----------------------------|-----------------|-----------------------------|----------------|
|              | Vehicle                     | TCB2           | Vehicle                     | BW723C86        | Vehicle                     | MK212          |
| VSL (µm/sec) | 120.62 ± 14.38              | 80.47 ± 20.12* | 128.74 ± 37.81              | 148.62 ± 34.69  | 121.64 ± 22.16              | 109.13 ± 21.69 |
| VCL (µm/sec) | 350.12 ± 34.71              | 276.68 ± 70.44 | 410.98 ± 112.59             | 421.54 ± 115.61 | 386.79 ± 68.93              | 344.52 ± 60.71 |
| VAP (µm/sec) | 179.49 ± 20.84              | 142.07 ± 32.29 | 215.71 ± 52.05              | 225.38 ± 52.92  | 215.23 ± 46.85              | 179.78 ± 19.41 |
| LIN          | 0.36 ± 0.06                 | 0.36 ± 0.07    | 0.32 ± 0.04                 | 0.37 ± 0.07     | 0.32 ± 0.03                 | 0.33 ± 0.06    |
| STR          | 0.67 ± 0.08                 | 0.62 ± 0.05    | 0.61 ± 0.12                 | 0.67 ± 0.06     | 0.57 ± 0.07                 | 0.63 ± 0.06    |
| ALH (µm)     | 8.46 ± 1.03                 | 7.79 ± 2.07    | 9.71 ± 1.97                 | 8.91 ± 2.89     | 9.20 ± 0.73                 | 8.92 ± 8.92    |
| BCF (Hz)     | 7.83 ± 1.40                 | 7.91 ± 1.58    | 8.12 ± 0.92                 | 9.15 ± 1.67     | 7.98 ± 1.97                 | 8.68 ± 0.98    |
| WOB          | 0.53 ± 0.05                 | 0.55 ± 0.05    | 0.54 ± 0.05                 | 0.55 ± 0.07     | 0.56 ± 0.03                 | 0.53 ± 0.07    |

Supplementary Table 1

Effects of 5-HT receptor agonists on motility assay of hamster sperm. Each value was indicated at 2 h culture when sperm were cultured for 4 h with 17 nM or 100 nM sumatriptan, 100 fM MS, 100 µM mCPBG, 10 pM MT, 7.3 nM WAY, 0.13 nM LP12, 0.75 nM TCB2, 2 µM BW723C86 and 0.3 nM MK212. Data represent the mean ± SD. (5-HT<sub>1</sub> Receptor) (Vehicle) the medium with 0.1% (v/v) pure water as vehicle; (respective concentrations of sumatriptan) the medium with indicated concentrations of sumatriptan and vehicle. (5-HT<sub>2</sub> Receptor) (Vehicle) same as above; (MS) the medium with 100 fM MS and vehicle. (5-HT<sub>3</sub> Receptor) (Vehicle) same as above; (mCPBG) the medium with 100 µM mCPBG and vehicle. (5-HT<sub>4</sub> Receptor) (Vehicle) medium with 0.1% (v/v) ethanol as vehicle; (MT) medium with 10 pM MT and vehicle. (5-HT<sub>6</sub> Receptor) (Vehicle) medium with 0.1% (v/v) pure water as vehicle; (WAY) medium with 7.3 nM WAY and vehicle. (5-HT<sub>7</sub> Receptor) (Vehicle) same as above; (LP12) medium with 0.13 nM LP12 and vehicle. (5-HT<sub>2A</sub> Receptor) (Vehicle) same as above; (TCB2) medium with 0.75 nM TCB2 and vehicle. (5-HT<sub>2B</sub> Receptor) (Vehicle) medium with 0.1% (v/v) dimethyl sulfoxide as vehicle; (BW723C86) medium with 2 µM BW723C86 and vehicle. (5-HT<sub>2C</sub> Receptor) (Vehicle) medium with 0.1% (v/v) pure water as vehicle; (MK212) medium with 0.3 nM MK212 and vehicle. \* indicates significant differences compared with "Vehicle" (P < 0.05).
